# Supplementary material for: Stromal SLIT2 impacts on pancreatic cancer-associated neural remodeling
Source: PubMed Central journal article supplement (PMC4669755; doi:10.1038/cddis.2014.557), 2015-01-15

A

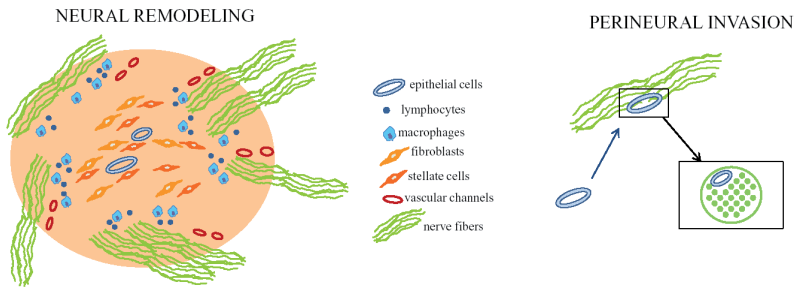

B

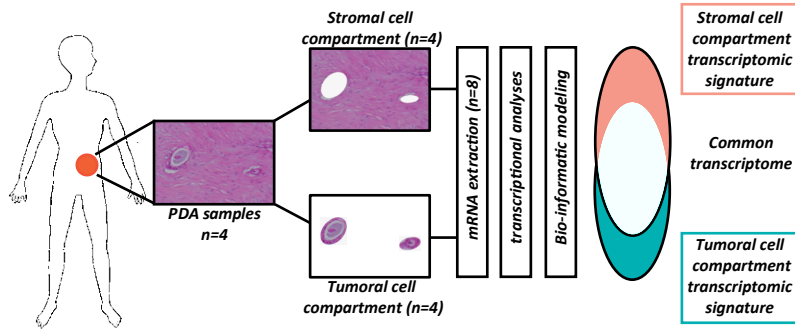

C

| Compartment  | Patient # | RIN |
|--------------|-----------|-----|
| Stroma       | 1         | 6.2 |
| Tumoral cell | 1         | 7   |
| Stroma       | 2         | 6.2 |
| Tumoral cell | 2         | 6.5 |
| Stroma       | 3         | 6.6 |
| Tumoral cell | 3         | 6.6 |
| Stroma       | 4         | 6.1 |
| Tumoral cell | 4         | 7.2 |

D

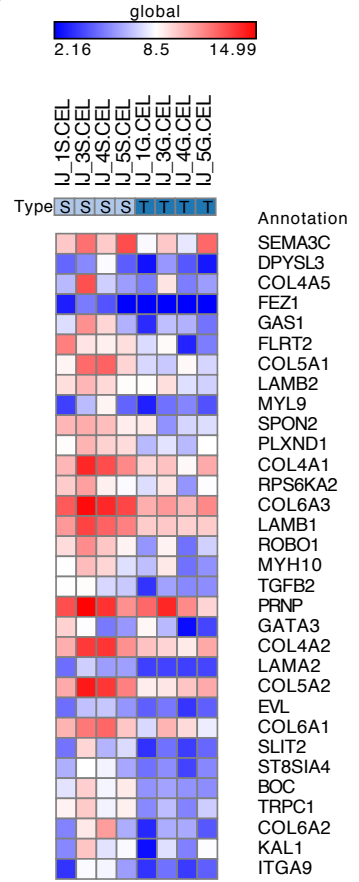

Supplement: cddis2014557x2.pdf [file cddis2014557x2.pdf]
