# Supplementary material for: Stromal SLIT2 impacts on pancreatic cancer-associated neural remodeling
Source: PubMed Central journal article supplement (PMC4669755; doi:10.1038/cddis.2014.557), 2015-01-15
Supplement: cddis2014557x3.pdf [file cddis2014557x3.pdf]

A

| <i>Gene</i>   | <i>Pk4A</i> | <i>M</i> | <i>FcoM</i> |
|---------------|-------------|----------|-------------|
| <i>CNTN1</i>  | 1           | 5,83     | 1,91        |
| <i>GAS1</i>   | 1           | 0,4      | 1,1         |
| <i>ITGA9</i>  | 1           | 1,5      | 0,9         |
| <i>LICAM</i>  | 1           | 543      | 0           |
| <i>DPYSL3</i> | 1           | 0        | 0           |
| <i>ROBO1</i>  | 1           | 0,3      | 0,1         |
| <i>SLIT2</i>  | 1           | 0        | 0           |
