# Supplementary material for: Stromal SLIT2 impacts on pancreatic cancer-associated neural remodeling
Source: PubMed Central journal article supplement (PMC4669755; doi:10.1038/cddis.2014.557), 2015-01-15

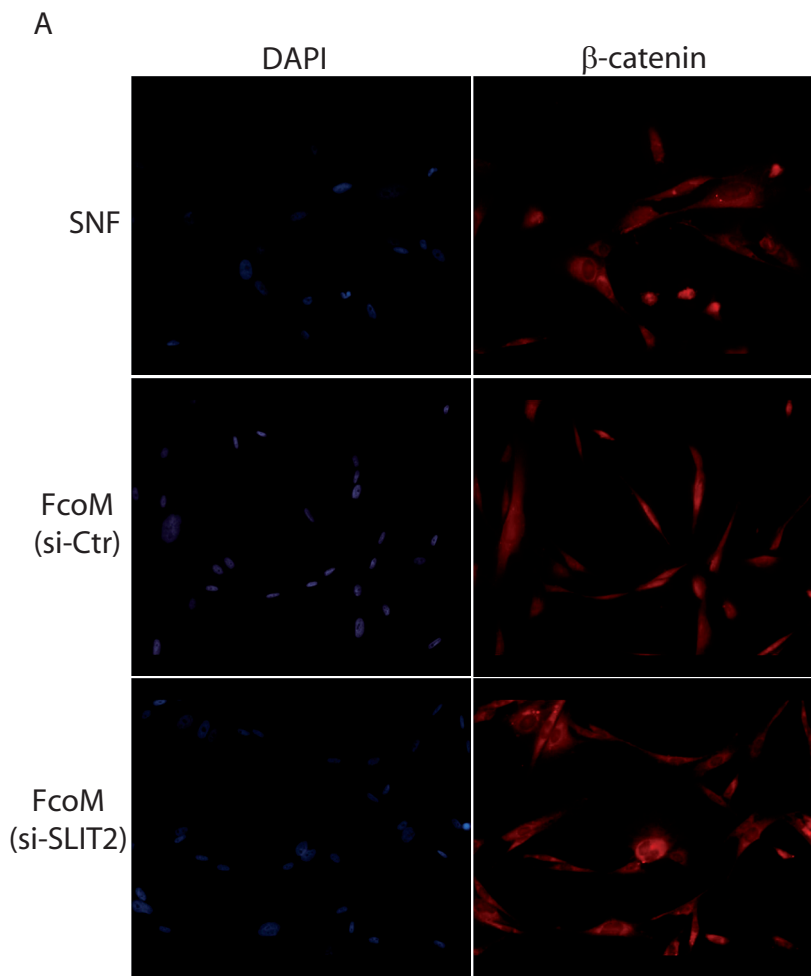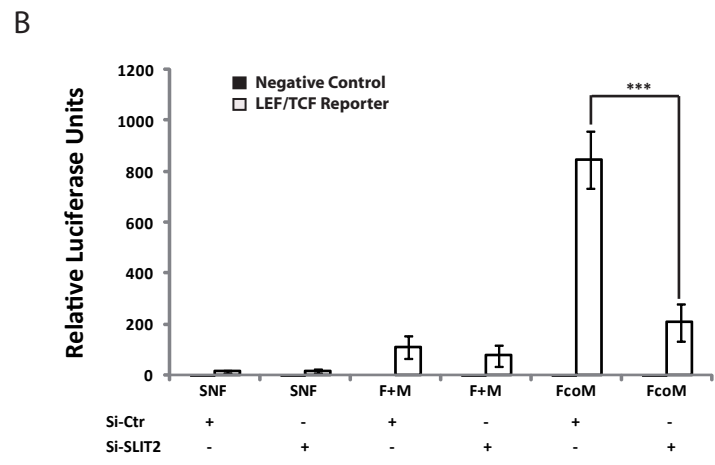

Supplement: cddis2014557x6.pdf [file cddis2014557x6.pdf]
