# Supplementary material for: Stromal SLIT2 impacts on pancreatic cancer-associated neural remodeling
Source: PubMed Central journal article supplement (PMC4669755; doi:10.1038/cddis.2014.557), 2015-01-15

A

| Mice Id | Intra-tu. Nerve | Peri-tu. Nerve | Total |
|---------|-----------------|----------------|-------|
| 85.2    | 47              | 42             | 89    |
| 87.4    | 2               | 2              | 4     |
| HC.3    | 9               | 9              | 18    |
| 87.3    | 11              | 27             | 38    |
| FN9     | 41              | 29             | 70    |
| 85.4    | 8               | 8              | 16    |
| FX2     | 46              | 36             | 82    |
| EK6     | 21              | 18             | 39    |
| 99.3    | 12              | 12             | 24    |
| FX3     | 22              | 8              | 30    |
| EO5     | 35              | 35             | 70    |
| ES6     | 13              | 23             | 36    |
| FT2     | 1               | 1              | 2     |
| EP1     | 1               | 2              | 3     |

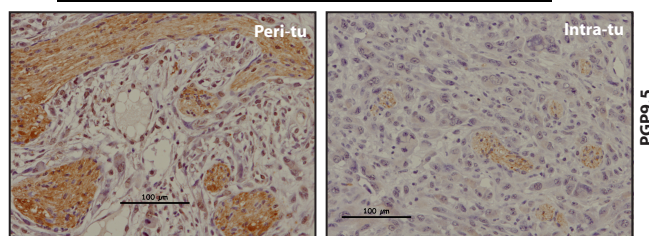

B

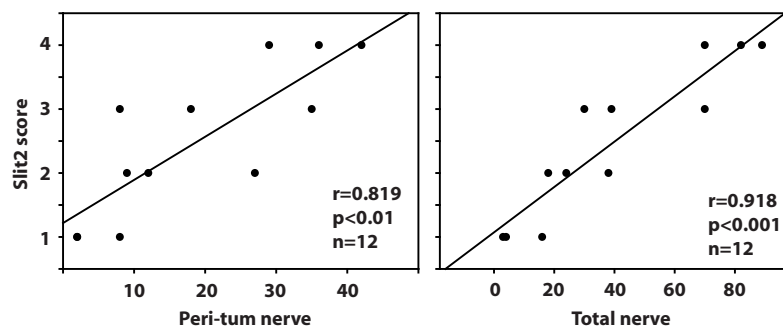

C

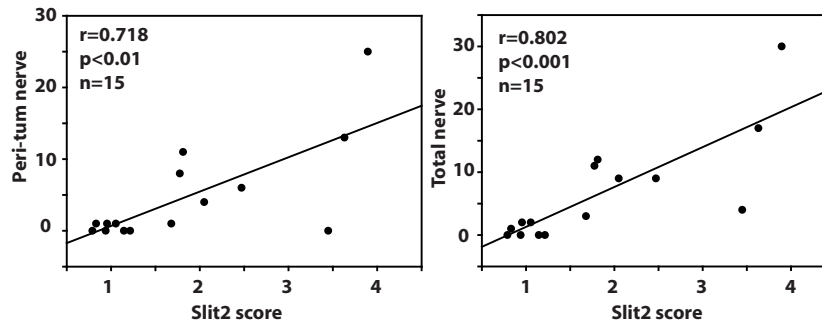

Supplement: cddis2014557x7.pdf [file cddis2014557x7.pdf]
